# Supplementary material
Source: PubMed Central journal article supplement (PMC3075752)
Supplement: pp.110.164681_1.pdf [file pp.110.164681_1.pdf]

## Modelling equations used in Figure 4

Here we derive the key equations used in Figures 4 to calculate CO<sub>2</sub> assimilation rate,  $A$ , chloroplast CO<sub>2</sub> partial pressure,  $C_{chlo}$ , from Rubisco and bicarbonate transporter activities and cell wall/plasamalema conductance,  $g_w$  and chloroplast envelope conductance,  $g_{chlo}$  to CO<sub>2</sub> diffusion. The equations are based on the C<sub>4</sub> and C<sub>3</sub> photosynthetic models given in von Caemmerer and Furbank (1999) and von Caemmerer (2000) and have been adapted from the single cell C<sub>4</sub> photosynthesis model presented by von Caemmerer and Furbank (2003).

CO<sub>2</sub> assimilation rate of a hypothetical C<sub>3</sub> photosynthesis system with a bicarbonate pump at the chloroplast envelope outlined in Figure 3a and 4 can be described by two simple equations. Since ultimately all CO<sub>2</sub> is fixed by Rubisco in the chloroplast the net rate of CO<sub>2</sub> assimilation,  $A$ , is

$$A = V_c - 0.5V_o - R_d \quad (A1)$$

where  $V_c$  and  $V_o$  are the rates of Rubisco carboxylation and oxygenations and  $R_d$  is the rate of mitochondrial respiration not associated with photorespiration.

We assume that the chloroplast receives extra CO<sub>2</sub> from the from the transport of bicarbonate into the chloroplast, such that

$$V_c = V_b - L \quad (A2)$$

where  $V_b$  is combined rate of the bicarbonate transporters, and  $L$  is the rate of CO<sub>2</sub> leakage across the chloroplast envelope. Equation (A2) differs from the standard formulation of the C<sub>4</sub> model because we assume that photorespiratory CO<sub>2</sub> loss occurs in the cytosol compartment. The leakage  $L$  in turn is given by

$$L = g_{chlo} (C_{chlo} - C_{cyt}) \quad (A3)$$

Where  $C_{chlo}$  and  $C_{cyt}$  are the chloroplast and cytosol CO<sub>2</sub> partial pressures respectively. Leakiness,  $\phi$ , can then be defined as the leak rate as a fraction of the rate of bicarbonate transport.

$$\phi = L/V_b \quad (A4)$$

It should be noted that leakrate and leakiness will be positive only if  $C_{chlo}$  is greater than  $C_{cyt}$ .

At high irradiance the maximal activity of Rubisco limits the rate of  $CO_2$  fixation rather than the light dependent capacities for the regeneration of RuBP which is not considered here.

Under these conditions Rubisco carboxylations is given by the RuBP saturated rate

$$V_c = \frac{C_{chlo} V_{c \max}}{C_{chlo} + K_c (1 + O / K_o)} \quad (A5)$$

where  $V_{c \max}$  is the maximum carboxylation rate and  $K_c$  and  $K_o$  are the Michaelis-Menten constants for  $CO_2$  and  $O_2$  and  $O$  is the  $O_2$  partial pressure in the chloroplast. Following the oxygenation of one mol of RuBP, 0.5 mol of  $CO_2$  is evolved in the photorespiratory pathway. The ratio of oxygenation to carboxylation can be expressed as

$$V_o / V_c = 2\Gamma_* / C_{chlo} \quad (A6)$$

and  $\Gamma_*$  the  $CO_2$  compensation point in the absence of mitochondrial respiration is determined by Rubisco's specificity ( $S_{c/o}$ ):

$$\Gamma_* = \frac{0.5O}{S_{c/o}} = 0.5[V_{o \max} K_c / (V_{c \max} K_o)]O \quad (A7)$$

where  $V_{o \max}$  is the maximal oxygenase activity.

The rate of bicarbonate transport is given as

$$V_b = \frac{C_{cyt} V_{b \max}}{C_{cyt} + K_b} \quad (A8)$$

where  $V_{b \max}$  is the maximal activity of the transporter and  $K_b$  is the Michaelis Menten constant for  $CO_2$ . This was converted from the Michaelis Menten constant for bicarbonate with the use of the Henderson Hasselbach equation assuming a cytosolic pH of 7.4. If more than one transporter is involved the individual rates can be summed. We modelled the rate of BicA ( $V_{bic}$ ) and SbtA ( $V_{Sb}$ ) individually and combined.

To obtain an overall rate equation for CO<sub>2</sub> assimilation as a function of the cytosol CO<sub>2</sub> partial pressure one can first derive a quadratic expression for the chloroplast CO<sub>2</sub> partial pressure  $C_{chlo}$ , by combining equations A2, A3 and A5.

This gives a quadratic of the form

$$(C_{chlo})^2 + b(C_{chlo}) + c = 0 \quad (A9)$$

where

$$C_{chlo} = \left( -b + \sqrt{b^2 - 4c} \right) / (2) \quad (A10)$$

and

$$b = -\left\{ C_{cyt} - K_c(1 + O/K_o) + (V_b - V_{cmax}) / g_{chlo} \right\} \quad (A11)$$

$$c = -K_c(1 + O/K_o)(C_{cyt} - V_b / g_{chlo}) \quad (A12)$$

With a solution for  $C_{chlo}$ , A can be calculated from equations A1, A5, and A6. Intercellular CO<sub>2</sub>,  $C_i$ , was calculated retrospectively from

$$C_i = C_{cyt} + A / g_w \quad (A13)$$

where  $g_w$  is the conductance to CO<sub>2</sub> diffusion across the cell wall plasmalemma interface.

ATP consumption rate was calculated from

$$ATPconsumption = \alpha V_b + (3 + 7\Gamma_s / C_{chlo}) V_c \quad (A14)$$

(See equation 4.27 von Caemmerer 2000). The energy cost of bicarbonate transport is uncertain but we assumed that the bicarbonate transporter BicA required the transport of one H<sup>+</sup> whereas SbtA required 2 H<sup>+</sup>. Assuming a requirement of 4 H<sup>+</sup> to generate an ATP we have calculated the ATP requirement of the transporters as 0.25ATP and 0.5 ATP per transport event respectively.

**Supplementary Table 1 Photosynthetic parameters used in the model simulation**

| Parameter                                           | Value             |
|-----------------------------------------------------|-------------------|
| $K_c$ ( $\mu\text{bar}$ )                           | 260 <sup>a</sup>  |
| $K_o$ (mbar)                                        | 179 <sup>a</sup>  |
| $S_{c/o}$ (bar/bar)                                 | 2585              |
| $\Gamma_*$ at 200 mbar $O_2$ ( $\mu\text{bar}$ )    | 38.6 <sup>a</sup> |
| $V_{cmax}$ ( $\mu\text{mol m}^{-2} \text{s}^{-1}$ ) | 100               |
| $R_d$ ( $\mu\text{mol m}^{-2} \text{s}^{-1}$ )      | 0                 |
| $V_{BicA}$ ( $\mu\text{mol m}^{-2} \text{s}^{-1}$ ) | 30                |
| $K_{BicA}$ ( $\mu\text{bar}$ )                      | 140               |
| $V_{SbtA}$ ( $\mu\text{mol m}^{-2} \text{s}^{-1}$ ) | 15                |
| $K_{Sbta}$ ( $\mu\text{bar}$ )                      | 15                |

<sup>a</sup> (von Caemmerer et al., (1994)).
